# Supplementary material for: Detection of Meat Adulteration Using Spectroscopy-Based Sensors
Source: Foods. 2021 Apr 15;10(4):861. doi: 10.3390/foods10040861 (PMC8071343; doi:10.3390/foods10040861)
Supplement: Supplementary file 1 [file foods-10-00861-s001.zip › foods-1171373-supplementary.pdf]

## Supplementary file

### **Pork - Chicken**

Table S1a. Confusion matrix for SVMs classification after feature extraction using PLS components (number of LVs= 3, explained variance= 96.64%) for the external validation ( $n=30$ ), using Vis data for fresh samples of pork/chicken and considering five classes, from 0% pork-100% chicken (0%) to 100% pork-0% chicken (100%).

| True class    | Predicted class |        |       |       |       | Recall (%)            |
|---------------|-----------------|--------|-------|-------|-------|-----------------------|
|               | 0%              | 25%    | 50%   | 75%   | 100%  |                       |
| 0%            | 2               | 0      | 4     | 0     | 0     | 33.33                 |
| 25%           | 0               | 2      | 4     | 0     | 0     | 33.33                 |
| 50%           | 0               | 0      | 6     | 0     | 0     | 100.00                |
| 75%           | 0               | 0      | 1     | 4     | 1     | 66.67                 |
| 100%          | 0               | 0      | 1     | 2     | 3     | 50.00                 |
| Precision (%) | 100.00          | 100.00 | 37.50 | 66.67 | 75.00 | Accuracy (%)<br>56.67 |

Table S1b. Confusion matrix for SVMs classification after feature extraction using PLS components (number of LVs= 3, explained variance= 96.55%) for the external validation ( $n=30$ ), using Vis data for fresh samples of pork/chicken and considering three classes: 0% pork-100% chicken (0%) - adulterated (A) - 100% pork-0% chicken (100%).

| True class    | Predicted class |       |        | Recall (%)            |
|---------------|-----------------|-------|--------|-----------------------|
|               | 0%              | A     | 100%   |                       |
| 0%            | 6               | 0     | 0      | 100.00                |
| A             | 0               | 18    | 0      | 100.00                |
| 100%          | 0               | 2     | 4      | 66.67                 |
| Precision (%) | 100.00          | 90.00 | 100.00 | Accuracy (%)<br>93.33 |

Table S2a. Confusion matrix for SVMs classification after feature extraction using PLS components (number of LVs= 3, explained variance= 92.53%) for the external validation ( $n=30$ ), using Fluo data for fresh samples of pork/chicken and considering five classes, from 0% pork-100% chicken (0%) to 100% pork-0% chicken (100%).

| True class    | Predicted class |       |       |       |                  | Recall (%)            |
|---------------|-----------------|-------|-------|-------|------------------|-----------------------|
|               | 0%              | 25%   | 50%   | 75%   | 100%             |                       |
| 0%            | 1               | 5     | 0     | 0     | 0                | 16.67                 |
| 25%           | 0               | 6     | 0     | 0     | 0                | 100.00                |
| 50%           | 0               | 0     | 5     | 1     | 0                | 83.33                 |
| 75%           | 0               | 0     | 0     | 6     | 0                | 100.00                |
| 100%          | 0               | 0     | 2     | 4     | 0                | 0.00                  |
| Precision (%) | 100.00          | 54.55 | 71.43 | 54.55 | NaN <sup>1</sup> | Accuracy (%)<br>60.00 |

<sup>1</sup> NaN: Not a Number

Table S2b. Confusion matrix for SVMs classification after feature extraction using PLS components (number of LVs= 3, explained variance= 93.47%) for the external validation ( $n=30$ ), using Fluo data for fresh samples of pork/chicken and considering three classes: 0% pork-100% chicken (0%) - adulterated (A) - 100% pork-0% chicken (100%).

| True class    | Predicted class |       |                  | Recall (%)            |
|---------------|-----------------|-------|------------------|-----------------------|
|               | 0%              | A     | 100%             |                       |
| 0%            | 6               | 0     | 0                | 100.00                |
| A             | 0               | 18    | 0                | 100.00                |
| 100%          | 0               | 6     | 0                | 0.00                  |
| Precision (%) | 100.00          | 75.00 | NaN <sup>1</sup> | Accuracy (%)<br>80.00 |

<sup>1</sup> NaN: Not a Number

Table S3a. Confusion matrix for SVMs classification after feature extraction using PLS components (number of LVs= 3, explained variance= 96.22%) for the external validation ( $n=30$ ) using MSI data for fresh samples of pork/chicken, and considering five classes, from 0% pork-100% chicken (0%) to 100% pork-0% chicken (100%).

| True class    | Predicted class |        |        |       |        | Recall (%)            |
|---------------|-----------------|--------|--------|-------|--------|-----------------------|
|               | 0%              | 25%    | 50%    | 75%   | 100%   |                       |
| 0%            | 6               | 0      | 0      | 0     | 0      | 100.00                |
| 25%           | 0               | 6      | 0      | 0     | 0      | 100.00                |
| 50%           | 0               | 0      | 6      | 0     | 0      | 100.00                |
| 75%           | 0               | 0      | 0      | 6     | 0      | 100.00                |
| 100%          | 0               | 0      | 0      | 3     | 3      | 50.00                 |
| Precision (%) | 100.00          | 100.00 | 100.00 | 66.67 | 100.00 | Accuracy (%)<br>90.00 |

Table S3b. Confusion matrix for SVMs classification after feature extraction using PLS components (number of LVs= 3, explained variance= 96.23%) for the external validation ( $n=30$ ), using MSI data for fresh samples of pork/chicken and considering three classes: 0% pork-100% chicken (0%) - adulterated (A) - 100% pork-0% chicken (100%).

| True class    | Predicted class |        |        | Recall (%)             |
|---------------|-----------------|--------|--------|------------------------|
|               | 0%              | A      | 100%   |                        |
| 0%            | 6               | 0      | 0      | 100.00                 |
| A             | 0               | 18     | 0      | 100.00                 |
| 100%          | 0               | 0      | 6      | 100.00                 |
| Precision (%) | 100.00          | 100.00 | 100.00 | Accuracy (%)<br>100.00 |

Table S4a. Confusion matrix for SVMs classification after feature extraction using PLS components (number of LVs= 3, explained variance= 96.56%) for the external validation ( $n=30$ ), using MSI data for frozen-thawed samples of pork/chicken and considering five classes, from 0% pork-100% chicken (0%) to 100% pork-0% chicken (100%).

| True class    | Predicted class |        |        |       |       | Recall (%)            |
|---------------|-----------------|--------|--------|-------|-------|-----------------------|
|               | 0%              | 25%    | 50%    | 75%   | 100%  |                       |
| 0%            | 6               | 0      | 0      | 0     | 0     | 100.00                |
| 25%           | 0               | 6      | 0      | 0     | 0     | 100.00                |
| 50%           | 0               | 0      | 5      | 1     | 0     | 83.33                 |
| 75%           | 0               | 0      | 0      | 3     | 3     | 50.00                 |
| 100%          | 0               | 0      | 0      | 0     | 6     | 100.00                |
| Precision (%) | 100.00          | 100.00 | 100.00 | 75.00 | 66.67 | Accuracy (%)<br>86.67 |

Table S4b. Confusion matrix for SVMs classification after feature extraction using PLS components (number of LVs= 3, explained variance= 96.63%) for the external validation ( $n=30$ ), using MSI data for frozen-thawed samples of pork/chicken and considering three classes: 0% pork-100% chicken (0%) - adulterated (A) - 100% pork-0% chicken (100%).

| True class    | Predicted class |        |       | Recall (%)            |
|---------------|-----------------|--------|-------|-----------------------|
|               | 0%              | A      | 100%  |                       |
| 0%            | 6               | 0      | 0     | 100.00                |
| A             | 0               | 16     | 2     | 88.89                 |
| 100%          | 0               | 0      | 6     | 100.00                |
| Precision (%) | 100.00          | 100.00 | 75.00 | Accuracy (%)<br>93.33 |

### **Beef - Offal**

Table S5a. Confusion matrix for SVMs classification after feature extraction using PLS components (number of LVs= 3, explained variance= 97.82%) for the external validation ( $n=30$ ), using Vis data for fresh samples of beef/bovine offal and considering five classes, from 0% beef-100% offal (0%) to 100% beef-0% offal (100%).

| True class    | Predicted class |       |                  |        |        | Recall (%)            |
|---------------|-----------------|-------|------------------|--------|--------|-----------------------|
|               | 0%              | 25%   | 50%              | 75%    | 100%   |                       |
| 0%            | 6               | 0     | 0                | 0      | 0      | 100.00                |
| 25%           | 0               | 6     | 0                | 0      | 0      | 100.00                |
| 50%           | 0               | 6     | 0                | 0      | 0      | 0.00                  |
| 75%           | 0               | 1     | 0                | 5      | 0      | 83.33                 |
| 100%          | 0               | 0     | 0                | 0      | 6      | 100.00                |
| Precision (%) | 100.00          | 46.15 | <sup>1</sup> NaN | 100.00 | 100.00 | Accuracy (%)<br>76.67 |

<sup>1</sup> NaN: Not a Number

Table S5b. Confusion matrix for SVMs classification after feature extraction using PLS components (number of LVs= 3, explained variance= 98.23%) for the external validation ( $n=30$ ), using Vis data for fresh samples of beef/bovine offal and considering three classes: 0% beef-100% offal (0%) - adulterated (A) - 100% beef-0% offal (100%).

| True class    | Predicted class |       |        | Recall (%)            |
|---------------|-----------------|-------|--------|-----------------------|
|               | 0%              | A     | 100%   |                       |
| 0%            | 5               | 1     | 0      | 83.33                 |
| A             | 0               | 18    | 0      | 100.00                |
| 100%          | 0               | 0     | 6      | 100.00                |
| Precision (%) | 100.00          | 94.74 | 100.00 | Accuracy (%)<br>96.67 |

Table S6a. Confusion matrix for SVMs classification after feature extraction using PLS components (number of LVs= 3, explained variance= 91.64%) for the external validation ( $n=30$ ) using Fluo data for fresh samples of beef/bovine offal and considering five classes, from 0% beef-100% offal (0%) to 100% beef-0% offal (100%).

| True class    | Predicted class |       |      |                  |       | Recall (%)            |
|---------------|-----------------|-------|------|------------------|-------|-----------------------|
|               | 0%              | 25%   | 50%  | 75%              | 100%  |                       |
| 0%            | 3               | 2     | 0    | 0                | 1     | 50.00                 |
| 25%           | 0               | 6     | 0    | 0                | 0     | 100.00                |
| 50%           | 0               | 6     | 0    | 0                | 0     | 0.00                  |
| 75%           | 0               | 5     | 1    | 0                | 0     | 0.0                   |
| 100%          | 0               | 0     | 0    | 0                | 6     | 100.00                |
| Precision (%) | 100.00          | 31.58 | 0.00 | NaN <sup>1</sup> | 85.71 | Accuracy (%)<br>50.00 |

<sup>1</sup> NaN: Not a Number

Table S6b. Confusion matrix for SVMs classification after feature extraction using PLS components (number of LVs= 3, explained variance= 91.38%) for the external validation ( $n=30$ ), using Fluo data for fresh samples of beef/bovine offal and considering three classes: 0% beef-100% offal (0%) - adulterated (A) - 100% beef-0% offal (100%).

| True class    | Predicted class |       |        | Recall (%)            |
|---------------|-----------------|-------|--------|-----------------------|
|               | 0%              | A     | 100%   |                       |
| 0%            | 3               | 3     | 0      | 50.00                 |
| A             | 8               | 10    | 0      | 55.56                 |
| 100%          | 0               | 0     | 6      | 100.00                |
| Precision (%) | 27.27           | 76.92 | 100.00 | Accuracy (%)<br>63.33 |

Table S7a. Confusion matrix for SVMs classification after feature extraction using PLS components (number of LVs= 2, explained variance=97.03%) for the external validation ( $n=30$ ), using MSI data for fresh samples of beef/bovine offal and considering five classes, from 0% beef-100% offal (0%) to 100% beef-0% offal (100%).

| True class    | Predicted class |        |        |        |        | Recall (%)             |
|---------------|-----------------|--------|--------|--------|--------|------------------------|
|               | 0%              | 25%    | 50%    | 75%    | 100%   |                        |
| 0%            | 6               | 0      | 0      | 0      | 0      | 100.00                 |
| 25%           | 0               | 6      | 0      | 0      | 0      | 100.00                 |
| 50%           | 0               | 0      | 6      | 0      | 0      | 100.00                 |
| 75%           | 0               | 0      | 0      | 6      | 0      | 100.00                 |
| 100%          | 0               | 0      | 0      | 0      | 6      | 100.00                 |
| Precision (%) | 100.00          | 100.00 | 100.00 | 100.00 | 100.00 | Accuracy (%)<br>100.00 |

Table S7b. Confusion matrix for SVMs classification after feature extraction using PLS components (number of LVs= 2, explained variance=97.11%) for the external validation ( $n=30$ ), using MSI data for fresh samples of beef/bovine offal and considering three classes: 0% beef-100% offal (0%) - adulterated (A) - 100% beef-0% offal (100%).

| True class    | Predicted class |       |        | Recall (%)            |
|---------------|-----------------|-------|--------|-----------------------|
|               | 0%              | A     | 100%   |                       |
| 0%            | 6               | 0     | 0      | 100.00                |
| A             | 0               | 18    | 0      | 100.00                |
| 100%          | 0               | 2     | 4      | 66.67                 |
| Precision (%) | 100.00          | 90.00 | 100.00 | Accuracy (%)<br>93.33 |

Table S8a. Confusion matrix for SVMs classification after feature extraction using PLS components (number of LVs= 3, explained variance= 98.81%) for the external validation ( $n=30$ ), using MSI data for frozen-thawed samples of beef/bovine offal and considering five classes, from 0% beef-100% offal (0%) to 100% beef-0% offal (100%).

| True class    | Predicted class |        |        |        |        | Recall (%)             |
|---------------|-----------------|--------|--------|--------|--------|------------------------|
|               | 0%              | 25%    | 50%    | 75%    | 100%   |                        |
| 0%            | 6               | 0      | 0      | 0      | 0      | 100.00                 |
| 25%           | 0               | 6      | 0      | 0      | 0      | 100.00                 |
| 50%           | 0               | 0      | 6      | 0      | 0      | 100.00                 |
| 75%           | 0               | 0      | 0      | 6      | 0      | 100.00                 |
| 100%          | 0               | 0      | 0      | 0      | 6      | 100.00                 |
| Precision (%) | 100.00          | 100.00 | 100.00 | 100.00 | 100.00 | Accuracy (%)<br>100.00 |

Table S8b. Confusion matrix for SVMs classification after feature extraction using PLS components (number of LVs= 3, explained variance= 98.50%) for the external validation ( $n = 30$ ), using MSI data for frozen-thawed samples of beef/bovine offal and considering three classes: 0% beef-100% offal (0%) - adulterated (A) - 100% beef-0% offal (100%).

| True class    | Predicted class |       |        | Recall (%)             |
|---------------|-----------------|-------|--------|------------------------|
|               | 0%              | A     | 100%   |                        |
| 0%            | 6               | 0     | 0      | 100.00                 |
| A             | 0               | 18    | 0      | 100.00                 |
| 100%          | 0               | 0     | 6      | 100.00                 |
| Precision (%) | 100.00          | 100.0 | 100.00 | Accuracy (%)<br>100.00 |
